# Supplementary material for: A sandwich-type triple-decker lanthanide complex with mixed phthalocyanine and Schiff base ligands
Source: Royal Society of Chemistry journal article supplement (doi:10.1039/c3dt51051d), 2013-01-01
Supplement: c3dt51051d.pdf [file c3dt51051d.pdf]

## Electronic Supplementary Information

### **The sandwich-type triple-decker lanthanide complex with mixed phthalocyanine and schiff base ligands**

Feng Gao,<sup>a</sup> Yu-Yang Li,<sup>a</sup> Cai-Ming Liu,<sup>b</sup> Yi-Zhi Li,<sup>a</sup> and Jing-Lin Zuo<sup>\*a</sup>

## Caption of Content

**1. Experimental section.**

**2. Table S1.** Selected bond lengths (Å) and angles (°) for complex **1**.

**3. Table S2.** Relaxation fitting parameters based on the extended Debye model from 2.0 K to 3.8 K for **1**.

**4. Figure S1.** Crystal packing of complex **1**.

**5. Figure S2.** UV-Vis absorption spectra for **1** in CH<sub>2</sub>Cl<sub>2</sub> ( $1 \times 10^{-5}$  M).

**6. Figure S3.** Frequency dependence of the in-phase ( $\chi'$ ) and out-of-phase ( $\chi''$ ) for **1** from 2.0 to 3.8 K at a 2 kOe dc field.

**7. References.**

## Experimental Section

### General Methods

All the reagents were commercially available and used without further purification. The half-sandwich complex [Dy(Pc)(acac)] and chiral Schiff base ligand H<sub>2</sub>L were prepared according to the published procedure.<sup>1,2</sup> Elemental analyses for C, H and N were performed on a Perkin-Elmer 240C analyzer. Melting points were determined with a X-4 digital micro melting point apparatus and were uncorrected. Infrared spectra were recorded on a Vector22 Bruker Spectrophotometer with KBr pellets in the 400–4000 cm<sup>-1</sup> region. UV–vis spectra were obtained on a UV–3100 spectrophotometer. Magnetic susceptibilities for polycrystalline sample were measured with the use of a Quantum Design MPMS-SQUID-VSM magnetometer in the temperature range 1.8–300 K. Field dependences of magnetization were measured using Quantum Design MPMS-SQUID-VSM system in an applied field up to 70 kOe.

### Synthetic Procedure

#### Procedure for preparation of [(Pc)<sub>2</sub>Dy<sub>2</sub>(L)(H<sub>2</sub>O)]·2CHCl<sub>3</sub>·H<sub>2</sub>O (1)

The half-sandwich complex [Dy(Pc)(acac)] (30.96 mg, 0.04 mmol) and chiral Schiff base ligand H<sub>2</sub>L (11.57 mg, 0.02 mmol) were mixed in 10 mL of CHCl<sub>3</sub>/CH<sub>3</sub>OH (v/v=2:1). The resulted mixture was stirred for about 1 h at room temperature, sealed in 20 mL Teflon-lined stainless steel autoclave, and heated at 80 °C for 24 h. Blue block-shaped crystals were collected by filtration after slow evaporation of the resulting solution for several days. Yield: 38%. M. p. > 300 °C. Anal. Calcd for C<sub>94</sub>H<sub>58</sub>Br<sub>2</sub>Cl<sub>6</sub>Dy<sub>2</sub>N<sub>18</sub>O<sub>4</sub> (%): C, 51.29; H, 2.66; N, 11.45. Found: C, 51.42; H, 2.89; N, 11.63. IR (KBr, cm<sup>-1</sup>): 3410(m), 3054(s), 1620(m), 1475(m), 1401(m), 1324(m), 1164(s), 1070(m), 879(s), 822(s), 733(m), 633(s). UV–vis (CH<sub>2</sub>Cl<sub>2</sub>, λ<sub>max</sub>/ nm, [log (ε / dm<sup>3</sup> mol<sup>-1</sup> cm<sup>-1</sup>) in parentheses]): 341(4.35), 618(4.07), 671(4.59), 683(4.61).

### X-ray Crystallography

The crystal structure was determined on a Siemens (Bruker) SMART CCD diffractometer using monochromated Mo Kα radiation (λ = 0.71073 Å) at 291 K. Cell parameters were retrieved using SMART software and refined using SAINT<sup>3</sup> on all observed reflections. Data was collected using a narrow-frame method with scan widths of 0.30° in ω and an exposure time of 10 s / frame. The highly redundant data sets were reduced using SAINT<sup>3</sup>

and corrected for Lorentz and polarization effects. Absorption correction was applied using SADABS<sup>4</sup> supplied by Bruker. Structures were solved by direct methods using the program SHELXL-97.<sup>5</sup> The positions of the metal atoms and their first coordination spheres were located from direct-methods *E* maps, other non-hydrogen atoms were found in alternating difference Fourier syntheses and least-squares refinement cycles and, during the final cycles, refined anisotropically. Hydrogen atoms were placed in calculated positions and refined as riding atoms with a uniform value of  $U_{\text{iso}}$ . CCDC reference number 929606 (**1**).

**Table S1.** Selected bond lengths (Å) and angles (°) for complex **1**

| Bond Distances(Å) |            |                   |            |
|-------------------|------------|-------------------|------------|
| Dy(1)-O(1)        | 2.379(3)   | Dy(1)-N(7)        | 2.376(5)   |
| Dy(1)-O(2)        | 2.382(3)   | Dy(1)-N(9)        | 2.591(4)   |
| Dy(2)-O(1)        | 2.376(3)   | Dy(1)-N(10)       | 2.619(4)   |
| Dy(2)-O(2)        | 2.397(4)   | Dy(2)-N(11)       | 2.266(5)   |
| Dy(2)-O(1W)       | 2.435(3)   | Dy(2)-N(13)       | 2.368(5)   |
| Dy(1)-N(1)        | 2.419(4)   | Dy(2)-N(15)       | 2.369(4)   |
| Dy(1)-N(3)        | 2.391(4)   | Dy(2)-N(17)       | 2.361(4)   |
| Dy(1)-N(5)        | 2.404(4)   |                   |            |
| Bond Angles(°)    |            |                   |            |
| N(7)-Dy(1)-O(1)   | 152.42(14) | N(3)-Dy(1)-N(10)  | 85.95(14)  |
| N(7)-Dy(1)-O(2)   | 85.82(13)  | N(5)-Dy(1)-N(10)  | 152.36(13) |
| O(1)-Dy(1)-O(2)   | 71.99(12)  | N(1)-Dy(1)-N(10)  | 79.16(14)  |
| N(7)-Dy(1)-N(3)   | 111.12(14) | N(9)-Dy(1)-N(10)  | 62.22(13)  |
| O(1)-Dy(1)-N(3)   | 81.26(13)  | N(11)-Dy(2)-N(17) | 73.88(16)  |
| O(2)-Dy(1)-N(3)   | 145.27(13) | N(11)-Dy(2)-N(13) | 74.33(16)  |
| N(7)-Dy(1)-N(5)   | 71.06(15)  | N(17)-Dy(2)-N(13) | 113.06(15) |
| O(1)-Dy(1)-N(5)   | 90.65(13)  | N(11)-Dy(2)-N(15) | 115.15(15) |
| O(2)-Dy(1)-N(5)   | 85.70(13)  | N(17)-Dy(2)-N(15) | 71.83(14)  |
| N(3)-Dy(1)-N(5)   | 72.63(14)  | N(13)-Dy(2)-N(15) | 71.22(15)  |
| N(7)-Dy(1)-N(1)   | 69.50(15)  | N(11)-Dy(2)-O(1)  | 89.20(14)  |
| O(1)-Dy(1)-N(1)   | 137.46(14) | N(17)-Dy(2)-O(1)  | 148.45(13) |
| O(2)-Dy(1)-N(1)   | 144.90(13) | N(13)-Dy(2)-O(1)  | 86.58(13)  |
| N(3)-Dy(1)-N(1)   | 69.26(14)  | N(15)-Dy(2)-O(1)  | 139.60(12) |
| N(5)-Dy(1)-N(1)   | 108.05(14) | N(11)-Dy(2)-O(2)  | 95.63(14)  |
| N(7)-Dy(1)-N(9)   | 81.26(14)  | N(17)-Dy(2)-O(2)  | 83.38(13)  |
| O(1)-Dy(1)-N(9)   | 105.03(12) | N(13)-Dy(2)-O(2)  | 156.44(14) |

---

|                  |            |                   |            |
|------------------|------------|-------------------|------------|
| O(2)-Dy(1)-N(9)  | 69.44(12)  | N(15)-Dy(2)-O(2)  | 131.78(14) |
| N(3)-Dy(1)-N(9)  | 140.83(14) | O(1)-Dy(2)-O(2)   | 71.77(12)  |
| N(5)-Dy(1)-N(9)  | 144.02(14) | N(11)-Dy(2)-O(1W) | 166.45(14) |
| N(1)-Dy(1)-N(9)  | 82.07(13)  | N(17)-Dy(2)-O(1W) | 119.50(14) |
| N(7)-Dy(1)-N(10) | 134.66(13) | N(13)-Dy(2)-O(1W) | 100.39(13) |
| O(1)-Dy(1)-N(10) | 68.52(12)  | N(15)-Dy(2)-O(1W) | 73.67(13)  |
| O(2)-Dy(1)-N(10) | 103.75(13) | O(1)-Dy(2)-O(1W)  | 77.93(12)  |
| Dy(2)-O(1)-Dy(1) | 108.48(14) | O(2)-Dy(2)-O(1W)  | 84.45(12)  |
| Dy(1)-O(2)-Dy(2) | 107.71(14) |                   |            |

---

**Table S2.** Relaxation fitting parameters based on the extended Debye model<sup>a</sup> from 2.0 K to 3.8 K for **1**

| T / K | $\chi_s / \text{cm}^3 \text{mol}^{-1}$ | $\chi_T / \text{cm}^3 \text{mol}^{-1}$ | $\ln(\tau_1 / \text{s})$ | $\alpha_1$ | $\ln(\tau_2 / \text{s})$ | $\alpha_2$ | $\beta$ |
|-------|----------------------------------------|----------------------------------------|--------------------------|------------|--------------------------|------------|---------|
| 2.0   | 0.53                                   | 10.36                                  | -1.27                    | 0.09       | -6.64                    | 0.42       | 0.40    |
| 2.4   | 0.76                                   | 9.72                                   | -1.62                    | 0.12       | -7.03                    | 0.35       | 0.37    |
| 2.6   | 0.89                                   | 9.53                                   | -1.66                    | 0.20       | -7.25                    | 0.31       | 0.38    |
| 2.8   | 0.84                                   | 9.23                                   | -1.73                    | 0.22       | -7.44                    | 0.31       | 0.34    |
| 3.0   | 0.87                                   | 8.61                                   | -1.85                    | 0.22       | -7.65                    | 0.30       | 0.30    |
| 3.2   | 0.94                                   | 8.18                                   | -1.92                    | 0.23       | -7.85                    | 0.29       | 0.27    |
| 3.4   | 0.92                                   | 7.78                                   | -1.99                    | 0.27       | -8.08                    | 0.30       | 0.24    |
| 3.6   | 0.81                                   | 7.27                                   | -2.06                    | 0.21       | -8.33                    | 0.33       | 0.17    |
| 3.8   | 0.86                                   | 6.91                                   | -2.13                    | 0.17       | -8.53                    | 0.34       | 0.14    |

$$^a \chi_{\text{total}}(\omega) = \chi_s + (\chi_T - \chi_s) \times \left[ \frac{\beta}{1 + (i\omega\tau_1)^{1-\alpha_1}} + \frac{1-\beta}{1 + (i\omega\tau_2)^{1-\alpha_2}} \right]$$

Where  $\chi_s$  is the adiabatic susceptibility,  $\chi_T$  is the isothermal susceptibility,  $\omega$  ( $=2\pi f$ ) is the angular frequency,  $\tau_1$  (low-frequency part) and  $\tau_2$  (high-frequency part) represent the magnetization relaxation times,  $\beta$  is the weight of the relaxation process.

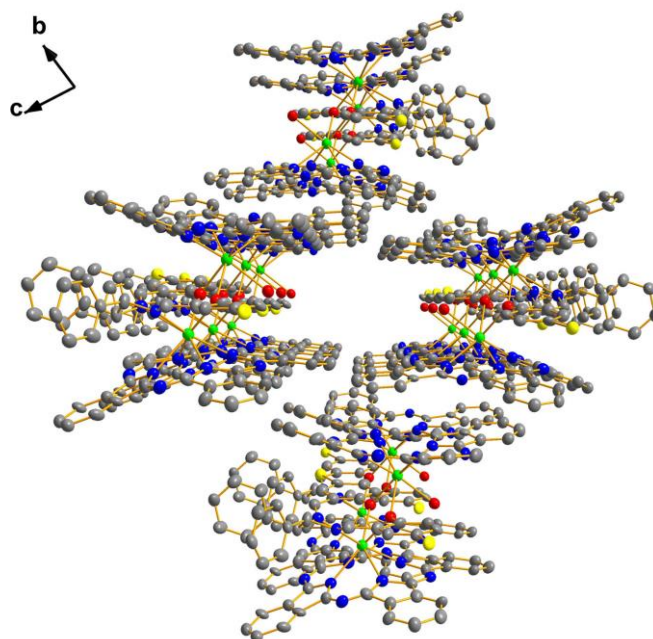

**Figure S1.** Crystal packing of complex **1**. Hydrogen atoms and solvent molecule are omitted for clarity [Dy(III) green, N blue, O red, Br yellow and C grey].

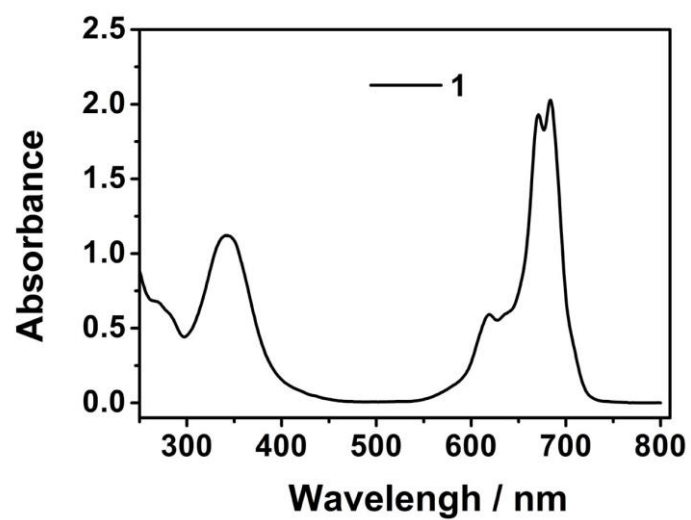

**Figure S2.** UV-Vis absorption spectra for **1** in  $\text{CH}_2\text{Cl}_2$  ( $1 \times 10^{-5}$  M).



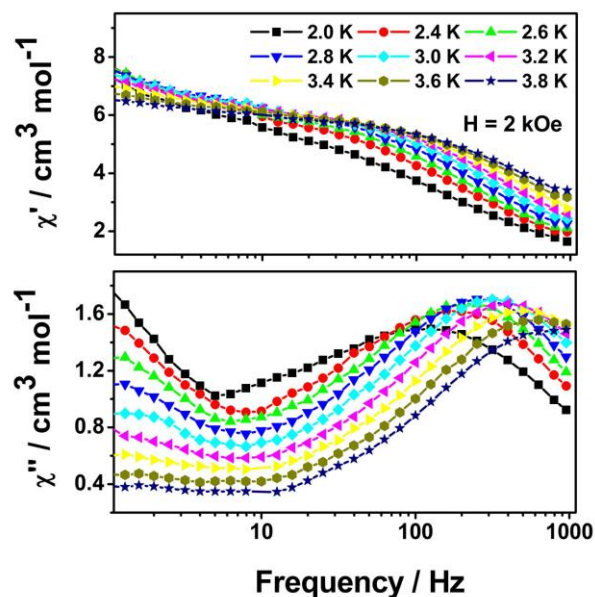

**Figure S3.** Frequency dependence of the in-phase ( $\chi'$ ) and out-of-phase ( $\chi''$ ) for **1** from 2.0 to 3.8 K at a 2 kOe dc field. The solid lines are guides only.

## References

- 1 Y. Bian, R. Wang, D. Wang, P. Zhu, R. Li, J. Dou, W. Liu, C.-F. Choi, H.-S. Chan, C. Ma, D. K. P. Ng and J. Jiang, *Helv. Chim. Acta.*, 2004, **87**, 2581.
- 2 Y. Jiang, L. Gong, X. Feng, W. Hu, W. Pan, Z. Li and A. Mi, *Tetrahedron*, 1997, **53**, 14327.
- 3 *SAINT-Plus*, version 6.02, Bruker Analytical X-ray System: Madison, WI, 1999.
- 4 G. M. Sheldrick, *SADABS An empirical absorption correction program*, Bruker Analytical X-ray Systems: Madison, WI, 1996.
- 5 G. M. Sheldrick, *SHELXTL-97*, Universität of Göttingen: Göttingen, Germany, 1997.
